# Supplementary material for: “Friending” Teens: Systematic Review of Social Media in Adolescent and Young Adult Health Care
Source: PubMed Central journal article supplement (PMC4376201; doi:10.2196/jmir.3692), 2015-01-05
Supplement: medinform_v17i1e297_app2.pdf [file medinform_v17i1e297_app2.pdf]

**Multimedia Appendix 2:** Summary table of studies included in systematic review.

| Authors                 | Purpose                                                                                                                                                     | Social Media Used      | Participants/<br>Sample Size                                                                                             | Methods                                                                                                                                                                                                                                                                                                               | Significant Positive / Negative Findings                                                                                                                                                                                                                                                                                                                                                                                                                                                                                                            |
|-------------------------|-------------------------------------------------------------------------------------------------------------------------------------------------------------|------------------------|--------------------------------------------------------------------------------------------------------------------------|-----------------------------------------------------------------------------------------------------------------------------------------------------------------------------------------------------------------------------------------------------------------------------------------------------------------------|-----------------------------------------------------------------------------------------------------------------------------------------------------------------------------------------------------------------------------------------------------------------------------------------------------------------------------------------------------------------------------------------------------------------------------------------------------------------------------------------------------------------------------------------------------|
| Tichon & Shapiro (2003) | To explore the supportive messages that are produced and responded to in an online support group for children who have a sibling with special needs         | Sibkids Email listserv | 655 separate emails from children who have a sibling with special needs over 3 months originating from 58 unique senders | Qualitative and quantitative content analysis of the Sibkids listserv postings for types of social support (informational, emotional, social companionship) exchanged, and the nature of self-disclosure shared by individual participants, use of descriptive statistics to capture important themes within the data | Self-disclosure was used in 3 different ways: 1) it functioned for the support recipient to initiate a transactional relationship with another member for the purpose of attracting social support through the open expression of concerns and frustrations; 2) it is then used by the support provider to demonstrate that coping is possible for the recipient through the reciprocal self-disclosure of similar concerns and situations with which the member has successfully dealt; 3) to share reciprocal social companionship relationships. |
| Ybarra et al. (2006)    | To identify the characteristics of youth who are targets of Internet harassment & characteristics related to reporting distress as a result of the incident | SNS                    | 1500 individuals 10-17 years old & their primary adult caregiver                                                         | Telephone questionnaire regarding internet use and harassment                                                                                                                                                                                                                                                         | The majority have not been harassed, but among those who are, the majority are not impacted emotionally by the event & disclose it to a peer or adult; though a minority, 1 in 3 targets of Internet harassment report being harassed 3 or more times, either by the same person or different people; social problems & online aggressive behavior are each associated with elevated odds of being the target of harassment                                                                                                                         |

|                         |                                                                                                                                                  |                                   |                                                                                            |                                                                                                                 |                                                                                                                                                                                                                                                                     |
|-------------------------|--------------------------------------------------------------------------------------------------------------------------------------------------|-----------------------------------|--------------------------------------------------------------------------------------------|-----------------------------------------------------------------------------------------------------------------|---------------------------------------------------------------------------------------------------------------------------------------------------------------------------------------------------------------------------------------------------------------------|
| Pantic et al. (2012)    | To investigate the relationship between social networking and depression indicators in adolescent population                                     | SNS including mention of Facebook | 160 high school students, avg. age 18 years old                                            | Interviews using an anonymous, structured questionnaire and Back Depression Inventory - 2nd edition (BDI-II-II) | The time spent on SNS was found to be related to the risk for depression determined by BDI-II                                                                                                                                                                       |
| O'Dea & Campbell (2011) | To examine the use of SNS in a rural town, and the potential of SNS to be used for preventative mental health care                               | SNS                               | 74 high-school students in a rural town in Australia (mean age 14.7 years old)             | Paper questionnaire regarding internet, SNS use & perceptions of mental health support                          | Participants who use SNS are less likely to engage anonymously elsewhere (such as chat sites); over 50% had gone online to find help on a mental health concern; participants felt least comfortable approaching formal sources of help (doctors, counselors, etc.) |
| Moreno et al. (2007)    | To examine 16- and 17-year-old Myspace profiles and determine the prevalence of personal risk behavior descriptions and identifiable information | Myspace                           | 142 profiles of individuals 16-17years old                                                 | Content analysis of Myspace profiles                                                                            | Most profiles (over 70%) included identifiable information, are frequently accessed by owners, and almost half (47%) included disclosure of sexual activity or substance use                                                                                        |
| Moreno et al. (2010a)   | To assess displayed alcohol references on Myspace profiles                                                                                       | Myspace                           | 400 profiles created by individuals within one county in Washington state, 17-20 years old | Content analysis of Myspace profiles                                                                            | Despite alcohol use being illegal and potentially stigmatizing in this population, explicit alcohol use is frequently referenced on adolescents' Myspace profiles across several sociodemographic communities                                                       |
| Egan & Moreno (2011a)   | To perform a content analysis of Facebook profiles for references to                                                                             | Facebook Profiles                 | 225 college males, 18-23 years old                                                         | Content analysis of public Facebook profiles using a previously used SNS codebook                               | Students who were of legal drinking age referenced alcohol 4.5 times more than underage students; and increase                                                                                                                                                      |

|                             |                                                                                                                                                                                                  |                   |                                                                                            |                                                                                                                                                                                            |                                                                                                                                                                                                                                                                                                                                       |
|-----------------------------|--------------------------------------------------------------------------------------------------------------------------------------------------------------------------------------------------|-------------------|--------------------------------------------------------------------------------------------|--------------------------------------------------------------------------------------------------------------------------------------------------------------------------------------------|---------------------------------------------------------------------------------------------------------------------------------------------------------------------------------------------------------------------------------------------------------------------------------------------------------------------------------------|
|                             | alcohol use including timing and content of alcohol references                                                                                                                                   |                   |                                                                                            |                                                                                                                                                                                            | reference was seen when entering college, and an increase in number of Facebook friends was associated with an increase in displayed alcohol references                                                                                                                                                                               |
| Griffiths & Casswell (2010) | To examine how young people in New Zealand engage with alcohol and reproduce alcohol marketing messages & alcohol-related branding in Bebo                                                       | Bebo              | 150 profiles created by individuals 16-20 years old                                        | Ethnographic content analysis of personal & fan Bebo profiles                                                                                                                              | Young people are creating 'intoxicogenic social identities' as well as 'intoxicogenic digital spaces' that further contribute towards the normalization of youth consumption of alcohol                                                                                                                                               |
| Ridout et al. (2012)        | To investigate identity construction through autophotography (the photographic essay) to provide insight into the portrayal of 'alcohol-identity' on Facebook                                    | Facebook          | 158 college students, 17-24 years old                                                      | Descriptive analysis of all photos linked to a participants' Facebook profile after friending a research profile                                                                           | Portraying oneself as a drinker is considered by many young people to be a socially desirable component of identity in the SNS environment, perpetuating an online culture that normalizes binge drinking; 60% of college participants reported potentially problematic alcohol use according to Alcohol Use Disorders identification |
| Whitehill et al. (2013)     | To determine acceptability, preferred communication medium, etc. for intervention by friends/professors/resident advisors/strangers in response to college students' references to depression on | Facebook Profiles | 60 1st-year college students (60% female), 18-19 years old from one large state university | Content analysis of public Facebook profiles for depression references and 1:1 interviews with participants regarding acceptability and preferred method of communication about depression | Face-to-face communication from friends & trusted adults is the preferred means for raising concerns about a student's signs of depression displays on Facebook; participants indicated a preference for more direct forms of communication as opposed to indirect/electronic means; participants,                                    |

|                             |                                                                                                                  |                                  |                                                                   |                                                                                                                                            |                                                                                                                                                                                                                                                                                                                     |
|-----------------------------|------------------------------------------------------------------------------------------------------------------|----------------------------------|-------------------------------------------------------------------|--------------------------------------------------------------------------------------------------------------------------------------------|---------------------------------------------------------------------------------------------------------------------------------------------------------------------------------------------------------------------------------------------------------------------------------------------------------------------|
|                             | Facebook                                                                                                         |                                  |                                                                   |                                                                                                                                            | especially those who displayed signs of depression on Facebook, did not approve of individuals with whom they do not have an offline relationship reaching out to them about the topic                                                                                                                              |
| Jenssen et al. (2009)       | To describe exposure to tobacco and smoking-related text & images on webpages and Myspace pages                  | SNS                              | 346 individuals, 14-17 years old                                  | Content analysis of webpages and Myspace pages collected from tracking of participant online activity using software, online questionnaire | Most tobacco references were found on SNS, and Myspace sites alone represented almost half of all pages containing tobacco content; overall, only a small proportion of websites visited by participants contained tobacco messages                                                                                 |
| Pujazon-Zazik et al. (2012) | To analyze teen profiles on a teen dating website for health risk content                                        | myLol.net, a teen dating website | 752 individuals, 14-18 years old                                  | Content analysis of public profiles                                                                                                        | Fewer adolescents include risky content vs. previous data from Myspace profiles; females were more likely to include mention of interest/participation in sexual risk behaviors possibly as a result of internalized social norms that place a high value on female sexuality; no significant age group differences |
| Moreno et al. (2010b)       | To evaluate whether online friends of adolescents who display sexual references on a SNS also display references | Myspace                          | 180 individuals & friends, 18 years old                           | Content analysis of Myspace profiles: 20 initial + 160 ("top 8" friends)                                                                   | Participants who displayed explicit sexual references were more likely to have online friends who displayed references in a similar pattern                                                                                                                                                                         |
| Moreno et al. (2011)        | To assess male college students views & expectations about sexual references displayed on                        | SNS                              | 28 college males from one large state university, 18-23 years old | Descriptive analysis of 7 small focus group discussions                                                                                    | Females who display sexual references on publicly available SNS profiles may be influencing potential partners' sexual expectations & dating                                                                                                                                                                        |

|                          |                                                                                                                                                                                                                    |     |                                                                   |                                                                            |                                                                                                                                                                                                                                                                                       |
|--------------------------|--------------------------------------------------------------------------------------------------------------------------------------------------------------------------------------------------------------------|-----|-------------------------------------------------------------------|----------------------------------------------------------------------------|---------------------------------------------------------------------------------------------------------------------------------------------------------------------------------------------------------------------------------------------------------------------------------------|
|                          | SNS by females                                                                                                                                                                                                     |     |                                                                   |                                                                            | intentions                                                                                                                                                                                                                                                                            |
| Dunlop et al. (2011)     | To determine whether Internet sites, such as online news & SNS, expose young people to suicide stories that might increase suicide ideation                                                                        | SNS | 719 individuals, 14-24 years old                                  | Phone interview with follow-up interview/online questionnaire 1 year later | The Internet & especially SNS are important sources of suicide stories; youth who had experienced hopelessness and those who were heavier SNS users and the internet were more likely to engage in blogging                                                                           |
| Ybarra & Mitchell (2008) | To describe the frequency of unwanted sexual solicitation online, including on SNS                                                                                                                                 | SNS | 1588 individuals, 10-15 years old & their primary adult caregiver | Online questionnaires                                                      | The majority who are targeted do not report it occurring on a SNS: 15 % of all youth reported being targeted by unwanted sexual solicitation online, with 4% specifically in a SNS; 32.5% report being harassed (threats, aggressive comments, rumors), with 9% specifically on a SNS |
| Wang et al. (2011)       | To examine the association between depression & frequency of involvement in physical, verbal, relational and cyber forms of bullying and to compare levels of depression among bullies, victims, and bully-victims | SNS | 7313 individuals in grades 6 to 10 (mean age 14.2)                | Anonymous self-reported paper questionnaire                                | Cyber victims reported higher depression than bullies or bully-victims, which was not found in any other form of bullying                                                                                                                                                             |

|                         |                                                                                                                                                                                   |                                            |                                                                              |                                                                                                       |                                                                                                                                                                                                                                                                                                                                                                                        |
|-------------------------|-----------------------------------------------------------------------------------------------------------------------------------------------------------------------------------|--------------------------------------------|------------------------------------------------------------------------------|-------------------------------------------------------------------------------------------------------|----------------------------------------------------------------------------------------------------------------------------------------------------------------------------------------------------------------------------------------------------------------------------------------------------------------------------------------------------------------------------------------|
| Marcus et al. (2012)    | To investigate the blogs of young adults with mental health concerns so as to better understand their experiences                                                                 | Blogs                                      | 8 blogs created by those 18-25 years old                                     | Grounded theory & qualitative content analysis of blogs                                               | Bloggers expressed significant feelings of powerlessness as a result of their mental health concerns and simultaneously felt a profound sense of loneliness, alienation, and lack of connection with others; half of bloggers stated that they used blogging as a means of coping, and found it that helped them through self-reflection, self-help, and acquiring much-needed support |
| Lam et al. (2013)       | To assess the quality, readability & social reach of websites on osteosarcoma for adolescents                                                                                     | Websites with links to social media or SNS | 56 websites                                                                  | Social reach was gauged by SNS links, global website traffic & a pilot adolescent-specificity measure | Most websites offered at least one form of social media, and one-third of websites utilized at least one site-specific form of social media (such as an interactive blog, community page, or public SNS) to engage users                                                                                                                                                               |
| Clerici et al. (2012)   | To describe the availability & type of video content and origin on YouTube relating to a particular set of pediatric neoplastic diseases (rhabdomyosarcoma & soft-tissue sarcoma) | YouTube                                    | 149 YouTube videos                                                           | Qualitative analysis of videos                                                                        | Majority of videos were amateur productions by patients or family members; there were more videos commemorating those who died than about cases that were cured                                                                                                                                                                                                                        |
| Nordfeldt et al. (2010) | To explore patients' and parents' attitudes toward a Web 2.0 portal for patients with type-1 diabetes (DM)                                                                        | Web 2.0 portal website "Diabit"            | 16 mothers & 3 fathers of patients with type-1 DM, 5 patients with type-1 DM | Qualitative analysis of essay responses to questions posed about the portal                           | Web 2.0 services have great potential for supporting parents and patients with type 1 diabetes by enhancing their information retrieval & disease management; content should be carefully maintained and                                                                                                                                                                               |

|                            |                                                                                                                                                                           |                                                                        |                                                                                                                                                 |                                                                                                                                                                                                          |                                                                                                                                                                                                                                                                                                                                                                            |
|----------------------------|---------------------------------------------------------------------------------------------------------------------------------------------------------------------------|------------------------------------------------------------------------|-------------------------------------------------------------------------------------------------------------------------------------------------|----------------------------------------------------------------------------------------------------------------------------------------------------------------------------------------------------------|----------------------------------------------------------------------------------------------------------------------------------------------------------------------------------------------------------------------------------------------------------------------------------------------------------------------------------------------------------------------------|
|                            |                                                                                                                                                                           |                                                                        |                                                                                                                                                 |                                                                                                                                                                                                          | updated by health care professionals who are alert and active on the site; the support from peers is of added value; login procedures should be simple and minimized as much as possible; the education of clinical practitioners regarding the use of Web 2.0 resources needs more attention                                                                              |
| D'Alessandro et al. (2012) | To investigate how college students can be social support catalysts for organ donation and how social, cognitive & attitudinal dimensions impact organ donor registration | Social media campaigns on Facebook, Twitter, YouTube, and project blog | 317 college-students in exploratory phase, 1800 responses to subsequent questionnaire; all members of Collegiate American Marketing Association | Exploratory interviews & focus groups which informed the creation of online questionnaires                                                                                                               | Within the student organization, organ donor registration increased by 28%; 18-month social media campaign collected 4473 Facebook members, 1189 YouTube video submissions with 164,000 views, motivated 19,623 people to go to a state's organ donor registration page, and had 9000 documented organ donor registrations                                                 |
| Divecha et al. (2012)      | To investigate how low-income parenting adolescents & young adults communicate about sexual health with peers using new media technologies                                | "New media technologies" (SNS)                                         | 94 parenting adolescents/young adults, 14-21 years old                                                                                          | Structured audio & computer-assisted self-interviews about use of new media technologies, communication with friends about sexual health and willingness to use new media technologies for communication | For conversations about sexual health, young urban parents prefer private forms of communication; race was associated with willingness: African Americans made up largest proportion that was willing, Latinos the largest proportion that were unwilling; those willing to communicate has greater condom self-efficacy, greater STD knowledge, and more Facebook friends |

|                       |                                                                                                                                                                                                                                   |                                |                                                  |                                                                                                                                                                                                      |                                                                                                                                                                                                                                                                                                                                                                                  |
|-----------------------|-----------------------------------------------------------------------------------------------------------------------------------------------------------------------------------------------------------------------------------|--------------------------------|--------------------------------------------------|------------------------------------------------------------------------------------------------------------------------------------------------------------------------------------------------------|----------------------------------------------------------------------------------------------------------------------------------------------------------------------------------------------------------------------------------------------------------------------------------------------------------------------------------------------------------------------------------|
| Moreno et al. (2009a) | To determine whether an online email intervention reduces references to sex & substance abuse on Myspace among at-risk adolescents                                                                                                | Myspace                        | 190 individuals 18-20 years old deemed "at-risk" | Randomized controlled Pilot Intervention Trial; Content analysis of Myspace profiles before & 3 mths after email intervention from researchers posing as an adolescent medicine physician, "Dr. Meg" | Brief email interventions through SNS show promise in reducing sexual references in online profiles of at-risk adolescents; females may be especially more open to feedback regarding their Web profiles & subsequently alter online behaviors                                                                                                                                   |
| Hedge & Donald (2011) | To explore the effectiveness and specific challenges of the Myspace project, which was developed to gain feedback on how to improve services and make sexual health information accessible to a larger and hard to reach audience | Myspace, Facebook, Bebo, High5 | 78 individuals, 15-25 years old                  | Created group study profile on each SNS, questionnaires completed by participants who viewed profile(s)                                                                                              | Little engagement on the profile site, possibly due to a reluctance to be identified as a service user                                                                                                                                                                                                                                                                           |
| Ramo et al. (2012)    | To examine Facebook as a mechanism to reach and survey young adults about tobacco and other substance use                                                                                                                         | Facebook Ads for recruitment   | 1548 cigarette users 18-25 years old             | Recruitment for online questionnaire about tobacco and other substance use using targeted Facebook Ads                                                                                               | Despite wide variety in the success of individual ads & potential concerns about sample representativeness, Facebook was a useful & cost-effective recruitment source; nearly half (48%) reported being unwilling to quit smoking within the next 6 months; Facebook guidelines limit use of language/pictures related to illegal activity and thereby widen target subject pool |



|                       |                                                                                                                                                                   |                   |                                                                                |                                                                                                                                         |                                                                                                                                                                                                                                                                                                                                                                          |
|-----------------------|-------------------------------------------------------------------------------------------------------------------------------------------------------------------|-------------------|--------------------------------------------------------------------------------|-----------------------------------------------------------------------------------------------------------------------------------------|--------------------------------------------------------------------------------------------------------------------------------------------------------------------------------------------------------------------------------------------------------------------------------------------------------------------------------------------------------------------------|
| Moreno et al. (2012b) | To determine associations between displayed depression symptoms on Facebook and self-reported depression via a depression screening questionnaire                 | Facebook Profiles | 215 college students from two large state universities, 18-20 years old        | Content analysis of public Facebook profiles using a previously used SNS codebook, online questionnaire to evaluate depressive symptoms | Displayed depression symptom references on Facebook were positively associated with PHQ-9 scores; despite the potential for stigma, approximately 33% of participants displayed depression symptom references on their Facebook profiles                                                                                                                                 |
| Moreno et al. (2012c) | To assess older adolescents' responses after learning that they were participants in a research study that involved identification of participants using Facebook | Facebook Profiles | 132 1st-year college students from one large state university, 18-19 years old | Qualitative descriptive analysis of semi-structured interviews about being identified on Facebook for a research study                  | The majority of adolescent participants viewed the use of Facebook for research positively; those who expressed concerns also voiced confusion regarding their current profile security settings (possible that these reactions were rooted in concerns regarding these participants' understanding of profile security settings)                                        |
| Moreno et al. (2012a) | To investigate college students' views towards potential SNS screening for intervention efforts regarding alcohol                                                 | Facebook          | 132 1st-year college students, 18-19 years old                                 | Qualitative analysis of interviews                                                                                                      | Participants reported that they would prefer to be approached in a direct manner by someone they knew to address worrisome alcohol references, but would also be open to approach by resident advisors or professors; and the style of approach was considered critical (open but direct, with good intention); use of Facebook as a medium of discussion may be helpful |

|                                   |                                                                                                                                                                                                                                    |                                                     |                                                                                                            |                                                                                                                                               |                                                                                                                                                                                                                                                                                                                                                                                                                                                                                                                       |
|-----------------------------------|------------------------------------------------------------------------------------------------------------------------------------------------------------------------------------------------------------------------------------|-----------------------------------------------------|------------------------------------------------------------------------------------------------------------|-----------------------------------------------------------------------------------------------------------------------------------------------|-----------------------------------------------------------------------------------------------------------------------------------------------------------------------------------------------------------------------------------------------------------------------------------------------------------------------------------------------------------------------------------------------------------------------------------------------------------------------------------------------------------------------|
| <p>Bauermeister et al. (2012)</p> | <p>To examine whether web-based respondent-driven sampling (webRDS) could be used to recruit young adults into a web questionnaire designed to assess alcohol and other drug (AOD) use</p>                                         | <p>Facebook Ads and webRDS for recruitment</p>      | <p>22 "seeds" recruited via Facebook with remainder 3,426 recruited via webRDS method, 18-24 years old</p> | <p>Recruitment of 22 webRDS seeds via targeted Facebook Ads, followed by dissemination through referrals</p>                                  | <p>webRDS helped overcome physical &amp; temporal barriers that helped expedite study recruitment; the asynchronous nature of online communication served as an added recruitment advantage because participants could invite peers even if they weren't online at the same time</p>                                                                                                                                                                                                                                  |
| <p>Stoddard et al. (2012)</p>     | <p>To examine the association between the presence of alcohol and other drug (AOD) use content in online social networking and perceived norms (online norms regarding AOD use &amp; anticipated regret with AOD use postings)</p> | <p>SNS, Facebook Ads and webRDS for recruitment</p> | <p>3448 individuals, 18-24 years old</p>                                                                   | <p>Online questionnaire regarding AOD use, norms &amp; peer support</p>                                                                       | <p>Those who reported a greater prevalence of alcohol content (e.g., pictures, wall posts) in their online profiles were also more likely to report greater alcohol use; peers play an important role in young adult AOD use, whether online or in person; young adults who had greater emotional support from online friends were less likely to report recent alcohol use; once prevalence of alcohol content was accounted for, there was no relationship between promotive AOD norms online &amp; alcohol use</p> |
| <p>Jones L et al. (2012)</p>      | <p>To describe the use of the social networking website in the re-recruitment &amp; tracking of adolescent girls into a follow-up study</p>                                                                                        | <p>Facebook Profile created for study purposes</p>  | <p>175 adolescent girls in 11th grade who were lost to follow-up for initial study with 730 girls</p>      | <p>Facebook study profile established to search for &amp; contact participants who couldn't be reached by traditional recruitment methods</p> | <p>Loss to follow-up was minimized by contacting through Facebook: ultimately re-recruited 6% of participants who would have otherwise been lost to follow-up; Facebook was cost-effective (free) compared to traditional methods (snail mail)</p>                                                                                                                                                                                                                                                                    |

|                      |                                                                                                                                                                                                                                                      |                              |                                                                    |                                                                                                                                                                                                                                           |                                                                                                                                                                                                                                                                                                                                                                                                                                                             |
|----------------------|------------------------------------------------------------------------------------------------------------------------------------------------------------------------------------------------------------------------------------------------------|------------------------------|--------------------------------------------------------------------|-------------------------------------------------------------------------------------------------------------------------------------------------------------------------------------------------------------------------------------------|-------------------------------------------------------------------------------------------------------------------------------------------------------------------------------------------------------------------------------------------------------------------------------------------------------------------------------------------------------------------------------------------------------------------------------------------------------------|
| Fenner et al. (2012) | To assess the feasibility of recruiting young females for a research study using targeted advertising on Facebook                                                                                                                                    | Facebook Ads for recruitment | 278 females, 16-25 years old                                       | Recruitment for online or in-person questionnaire using targeted Facebook Ads                                                                                                                                                             | Recruitment yielded a demographically representative sample and was cost-effective; it allowed for flexibility to monitor real-time performance of recruitment efforts; the ability to reach those in rural areas and overweight/obese individuals indicate a potential utility in recruiting those traditionally underrepresented in research, high-risk individuals, and those with specific health conditions                                            |
| Selkie et al. (2011) | To determine adolescents' views regarding how new technologies (SNS and SMS) could be used for sexual health education and identify themes that would assist providers and educators who may be interested in providing electronic sexual health ed. | SNS                          | 29 individuals (65.5% female, 62.1% heterosexual), 14-19 years old | Small focus groups were designed to explore ways AYAs use SNS and SMS and their views regarding using these technologies for sexual health information; transcripts were analyzed using the constant comparative method for common themes | Themes common to the resources adolescents currently use/would like to use for sexual health information: accessibility, trustworthiness, credibility & confidentiality, personal comfort; participants expressed that they used resources like Google to find information because they felt this was the only method available and that they would rather get answers via personal communication with a credible source, but would like it to be anonymous |
| Moreno et al. (200b) | To determine the prevalence of/associations among displayed health risk behaviors in sample of                                                                                                                                                       | Myspace                      | 500 individuals, 18 years old                                      | Content analysis of Myspace profiles                                                                                                                                                                                                      | Just over half (54%) of profiles referenced 1 or more health risk behaviors (substance use, sexual activity, violence)                                                                                                                                                                                                                                                                                                                                      |

|                       |                                                                                                                                                                           |                                           |                                                                                                                                                         |                                                                                                                                                                  |                                                                                                                                                                                                                                                                                                                                                                                                                            |
|-----------------------|---------------------------------------------------------------------------------------------------------------------------------------------------------------------------|-------------------------------------------|---------------------------------------------------------------------------------------------------------------------------------------------------------|------------------------------------------------------------------------------------------------------------------------------------------------------------------|----------------------------------------------------------------------------------------------------------------------------------------------------------------------------------------------------------------------------------------------------------------------------------------------------------------------------------------------------------------------------------------------------------------------------|
|                       | adolescents' Myspace profiles                                                                                                                                             |                                           |                                                                                                                                                         |                                                                                                                                                                  |                                                                                                                                                                                                                                                                                                                                                                                                                            |
| Gao et al. (2013)     | To examine the manifestations, impact, and origins of dental fear & anxiety (DFA) in children & adolescents from the public's perspective using YouTube                   | YouTube                                   | 27 videos involving children/adolescents associated with keywords relating to DFA                                                                       | Thematic content analysis of YouTube videos                                                                                                                      | About half of the videos had been viewed hundreds to thousands of times (5 were very popular, with more than 10,000 views each); videos revealed multifaceted manifestations, impacts, and origins of DFA; the nature and extent of psychological impacts were striking (especially internalization of fear, which may lead to psychological or behavioral withdrawal, feelings of shame or inferiority & low self-esteem) |
| Egan & Moreno (2011b) | To evaluate whether Facebook profiles might be useful for screening students at risk for stress-related conditions                                                        | Facebook profiles                         | 300 college students from one large state university, 18-19 years old                                                                                   | Content analysis of public Facebook profiles using a previously used SNS codebook                                                                                | Stress references were present on 46% of the female profiles, and the majority of stress references were made by females (78%); stress references were most commonly displayed in status updates (98%); positive association between referencing stress and both weight concerns & depressive symptoms                                                                                                                     |
| Stokes (2007)         | To investigate sexual scripts, self-definition (identity) and hip hop culture in home pages (of an SNS site) constructed by Black girls aged 14-17 living in southern USA | NevaEvaLand, an SNS for Black adolescents | Core sample of 216 pages, 27 pages for in-depth analysis; females 14-17 years old who self-identified as Black, African-American, or of African descent | Ethnographic and quantitative content analysis of pages, verification of preliminary themes/conclusion via consultation with "expert panel" of young Black women | An association was found between sexual scripts and hip-hop music; sexuality education programmes that ignore the role of media in the lives of Black girls may be ineffective; media messages and girls' self-representations in their pages reflect                                                                                                                                                                      |

|                         |                                                                                                                                                                                                    |                           |                                                                                                                          |                                                                                                                                                        |                                                                                                                                                                                                                                                                                                                                                                       |
|-------------------------|----------------------------------------------------------------------------------------------------------------------------------------------------------------------------------------------------|---------------------------|--------------------------------------------------------------------------------------------------------------------------|--------------------------------------------------------------------------------------------------------------------------------------------------------|-----------------------------------------------------------------------------------------------------------------------------------------------------------------------------------------------------------------------------------------------------------------------------------------------------------------------------------------------------------------------|
|                         |                                                                                                                                                                                                    |                           | residing in 1 of 7 southern states                                                                                       |                                                                                                                                                        | racism, misogyny, patriarchy, and capitalism in American culture                                                                                                                                                                                                                                                                                                      |
| Villard & Moreno (2012) | Determine a) how and to what extent college students are discussing fitness on Facebook and b) how user-generated fitness information is linked to advertisements for fitness products and advice. | Facebook Profiles and Ads | 1) 60 Facebook profiles of college freshmen 18-20 years old within a university network on Facebook, 2) 800 Facebook Ads | Content analysis of Facebook profiles for displayed fitness references and content analysis of Facebook ads elicited by fitness-related Facebook posts | About 72% of profiles referenced one or more fitness behaviors; 97.6% referenced exercise, 4.9% dieting, and 4.9% unhealthy eating. Among the first 40 ads linked to generated status updates, 40.3% were fitness related but not very relevant or accessible to the population: most ads were for charity runs (30.4%), fitness apparel (24.2%), or fad diets (9.9%) |
| Cash et al. (2013)      | To explore the ways in which adolescents use Myspace to comment on their suicidal thoughts and intentions through content analysis of Myspace profiles                                             | Myspace Profiles          | 64 relevant comments from public Myspace profiles of individuals 13-24 years old                                         | Content analysis of comments extracted from profiles that reflected potential suicidality                                                              | Existence of serious suicidal comments on Myspace pages, indicating that adolescents may reach out using SNS for help & support; the majority of comments had no context but 42% pertained to relationships including: break-ups, family relationships, and friendships; 6.3% of statements involved references to mental health problems                             |

|                                |                                                                                                                                                                                                                                                                                                           |                        |                                                                                                                                                    |                                                                                                                                                                                   |                                                                                                                                                                                                                                                                                                                                                                                                     |
|--------------------------------|-----------------------------------------------------------------------------------------------------------------------------------------------------------------------------------------------------------------------------------------------------------------------------------------------------------|------------------------|----------------------------------------------------------------------------------------------------------------------------------------------------|-----------------------------------------------------------------------------------------------------------------------------------------------------------------------------------|-----------------------------------------------------------------------------------------------------------------------------------------------------------------------------------------------------------------------------------------------------------------------------------------------------------------------------------------------------------------------------------------------------|
| <p>Lefkowitz et al. (2012)</p> | <p>To examine a student-constructed holiday, "State Patty's Day," at a university with a dominant drinking culture and the use of Facebook in the spread of information regarding the event, the effects of the holiday on individuals' drinking behaviors, and community-level crime on the holiday.</p> | <p>Facebook groups</p> | <p>11 Facebook groups that referred to the 2007 holiday, 227 1st year college students at a large state university, 18-20 years old (51% male)</p> | <p>Content analysis of Facebook groups and online questionnaire sent via emails to students</p>                                                                                   | <p>Messages about the holiday on Facebook focused on drinking &amp; social aspects of the holiday including the social context of drinking, a sense of belonging to a larger community, and the social norms of drinking; messages were rarely about consequences and were rarely negative in nature</p>                                                                                            |
| <p>Robertson et al. (2012)</p> | <p>To describe an adolescent suicide cluster that drew attention to the possible role of online social networking and SMS as sources of contagion after a suicide and obstacles to recognition of a potential cluster</p>                                                                                 | <p>Bebo</p>            | <p>Individuals from a rural city district in New Zealand, 15-18 years old</p>                                                                      | <p>Public health approach to analysis of Bebo profiles, interviews and multidisciplinary community response, probability of a time-space cluster using Monte Carlo simulation</p> | <p>Evidence from analysis provided support for a cluster of six deaths in a 6-month period; several suicides were linked by SNS, including sites created in memory of earlier suicide cases; mobile phones also facilitated the rapid spread of information and rumor about the deaths throughout the community, which made the recognition and management of a possible cluster more difficult</p> |

|                         |                                                                                                                                                                                                                                                 |          |                                                                                                                                         |                                                                                                                                                                                                                          |                                                                                                                                                                                                                                                                                                                                    |
|-------------------------|-------------------------------------------------------------------------------------------------------------------------------------------------------------------------------------------------------------------------------------------------|----------|-----------------------------------------------------------------------------------------------------------------------------------------|--------------------------------------------------------------------------------------------------------------------------------------------------------------------------------------------------------------------------|------------------------------------------------------------------------------------------------------------------------------------------------------------------------------------------------------------------------------------------------------------------------------------------------------------------------------------|
| Brockman et al. (2012)  | 1) confirm prevalence of hookah use among US college students 2) identify substances commonly smoked in hookahs and other substance use characteristics of hookah smokers 3) to assess the prevalence of hookah references on Facebook profiles | Facebook | 307 profiles of college students within 2 university networks on Facebook, 18-20 years old, 216 of which also completed a questionnaire | Questionnaire evaluating hookah use was administered to those who had their public profiles analyzed for hookah references                                                                                               | Hookah references were present on 5% of Facebook profiles; response rate for the questionnaire was 70%                                                                                                                                                                                                                             |
| O'Dea & Campbell (2012) | To explore perceptions & frequency of cyber-bullying experiences and to examine the relationship between SNS use and the experience of cyber-bullying                                                                                           | SNS      | 400 Australian high-school students, 12-17 years old                                                                                    | Online self-reported questionnaire                                                                                                                                                                                       | 51.5% of participants reported that they accept friend requests from unknown people on SNS; ownership of a SNS profile may be a stronger predictor of some cyber-bullying experiences compared to time spent on these sites                                                                                                        |
| Egan et al. (2013)      | To explore college students' views regarding the mental health status updates of their peers                                                                                                                                                    | Facebook | 7 focus groups with 34 undergraduate students, 18-23 years old from one large public university (74% female)                            | Qualitative analysis based on grounded theory of small focus groups; as part of the focus group, participants also viewed hypothetical status updates that referenced being depressed or anxious to stimulate discussion | Although some participants viewed mental health status updates as "jokes" (not serious), many expressed genuine concern about these "calls for help"; willingness to act on concerns tended to parallel offline relationships (students felt comfortable approaching a close friend but not casual acquaintance or distant friend) |

|                          |                                                                                                                                                               |          |                                                                                                        |                                                                                                                                                                                                                |                                                                                                                                                                                                                                                                                                                      |
|--------------------------|---------------------------------------------------------------------------------------------------------------------------------------------------------------|----------|--------------------------------------------------------------------------------------------------------|----------------------------------------------------------------------------------------------------------------------------------------------------------------------------------------------------------------|----------------------------------------------------------------------------------------------------------------------------------------------------------------------------------------------------------------------------------------------------------------------------------------------------------------------|
| Moreno et al. (2009c)    | To determine adolescents' interpretations of alcohol references displayed on SNS                                                                              | SNS      | 32 individuals recruited from local recreation centers and clinics, 11-18 years old                    | Small focus groups of 3-6 participants, asked to discuss thoughts and interpretations of displayed alcohol references on adolescent SNS profiles that they have seen before, from which themes were identified | Regardless of whether displayed alcohol references represent actual use, adolescents typically interpret these references as representing actual use and acknowledge their potential influence on peer behavior                                                                                                      |
| Nordfeldt et al. (2013)  | To understand information-seeking behaviors, Internet use and social networking online in adolescents with type 1 diabetes (T1DM).                            | SNS      | 24 adolescent patients with T1DM recruited from a county hospital in southeast Sweden, 10-17 years old | Qualitative content analysis of audio and video-recorded focus groups (8 groups)                                                                                                                               | Participants expressed concerns about security and privacy of communicating online, the reliability of information presented, the frequency of updates in information presented and simplicity in design of a website                                                                                                |
| Yang & Brown (2013)      | To examine associations between patterns of Facebook activity, motives for using Facebook, and late adolescents' social adjustment to the college environment | Facebook | 193 college students (54% female) attending a Midwestern US university                                 | Anonymous self-reported questionnaire regarding use of Facebook & social experiences in college                                                                                                                | More frequent engagement in Facebook interactions was associated with better social adjustment & lower level of loneliness; Facebook status updating was related to poor social adjustment and higher levels of loneliness only for those who were less motivated to use Facebook to maintain existing relationships |
| Jelenchick et al. (2013) | To evaluate the association between social networking site (SNS) use and depression in older adolescents                                                      | SNS      | 190 college students (58% female), 18-23 years old                                                     | Initial online questionnaire, followed by ESM questionnaire administered over 7 days using SMS to personal cellphones, all regarding SNS use                                                                   | Most participants reported low (53%) or average (39%) daily SNS use and only a minority (8%) reported high use; no evidence found supporting a relationship between SNS use & clinical depression                                                                                                                    |



|                                 |                                                                                                                                                                                                          |                                                                                       |                                                                                |                                                                                                                      |                                                                                                                                                                                                                                                                                                                                                                          |
|---------------------------------|----------------------------------------------------------------------------------------------------------------------------------------------------------------------------------------------------------|---------------------------------------------------------------------------------------|--------------------------------------------------------------------------------|----------------------------------------------------------------------------------------------------------------------|--------------------------------------------------------------------------------------------------------------------------------------------------------------------------------------------------------------------------------------------------------------------------------------------------------------------------------------------------------------------------|
|                                 | using an experience sample method (ESM) approach                                                                                                                                                         |                                                                                       |                                                                                |                                                                                                                      |                                                                                                                                                                                                                                                                                                                                                                          |
| van der Velden & El Emam (2013) | To understand how chronically ill teenage patients manage their privacy on social media sites                                                                                                            | "Upopolis" (closed online SNS for young patients in Canada) & other common public SNS | 20 hospital patients, 12-18 years old                                          | Qualitative descriptive analysis of semi-structured interviews                                                       | The majority of patients do not use social media to connect with peer disease-sufferers, and use public SNS to maintain their existing social networks outside the hospital; patients experience high levels of social & psychological privacy as a result of their privacy-protective behavior and do not express concern about their informational privacy on Facebook |
| Vyas et al. (2012)              | To examine SMS & social media utilization/behavior and how SMS & social media can be effectively used as part of public health interventions focused on decreasing sexual risk-taking among Latino youth | SNS, specifically asked about Facebook in qualitative interview phase                 | 9th & 10th grade Latinos (57% female), 428 for questionnaire, 15 for interview | Mixed-methods: audio-assisted computer-based questionnaire followed by interviews regarding social media and SMS use | Social media & SMS use are pervasive among students, though Facebook may be slightly more feasible due to popularity & lack of access to mobile phones; program staff & students perceive these tools as credible and essential methods of communication; students expressed desire for 2-way messaging                                                                  |
| Whiteley et al. (2011)          | To investigate if frequency of cell phone & Internet use relates to psychological constructs (depression, life satisfaction, impulsivity) and to examine if frequency of                                 | SNS                                                                                   | 1518 African-Americans, 13-18 years old                                        | Audio computer-assisted self-interview (ACASI)                                                                       | Majority of participants used Myspace; association of increased cell phone frequency with sexual sensation seeking, impulsivity, & riskier peer sexual norms                                                                                                                                                                                                             |

|                         |                                                                                                                                                                               |            |                                                                                                               |                                                                                  |                                                                                                                                                                                                                                                                                          |
|-------------------------|-------------------------------------------------------------------------------------------------------------------------------------------------------------------------------|------------|---------------------------------------------------------------------------------------------------------------|----------------------------------------------------------------------------------|------------------------------------------------------------------------------------------------------------------------------------------------------------------------------------------------------------------------------------------------------------------------------------------|
|                         | cell phone & Internet use relates to HIV/STI risk behaviors                                                                                                                   |            |                                                                                                               |                                                                                  |                                                                                                                                                                                                                                                                                          |
| Veinot et al. (2011)    | To examine how low-SES youth use information & communication technologies to socialize with others, and how this aligns with their communication about sexuality and HIV/STIs | SNS        | 94 individuals from a low-SES county, 14-24 years old                                                         | Descriptive analysis of 12 semi-structured focus groups                          | Young people frequently aired their concerns/fears of HIV/STI on SNS via spread of gossip/rumors, cautionary tales, etc.; many expressed hunger for credible information regarding sexual health, and expressed a desire to be supported/be a positive influence                         |
| van Rooij et al. (2010) | To explore the relationship between time spent on various Internet applications (including online gaming) & Compulsive Internet Use (CIU)                                     | SNS, blogs | 11094 secondary school students including 1421 longitudinal cohort, in the Netherlands (avg. age 14years old) | Paper questionnaire, including 14-item version of Compulsive Internet Use Survey | Strong link between online video gaming and CIU; changes in CIU over a year were shown to be most strongly related to changes in online gaming; strong association between CIU and downloading; SNS use has strongest association with CIU after gaming                                  |
| Rice et al. (2010)      | To examine the association between sexual health & internet/SNS use among homeless youths at risk for contracting HIV/AIDS                                                    | SNS        | 201 homeless adolescents, 13-24 years old                                                                     | Computer-administered self-interview                                             | 84% of participants accessed the internet at least once a week; those who used the Internet/SNS to communicate with street peers were 5x more likely to engage in exchange sex, while those using to communicate with family was associated with a 68% reduction in odds of exchange sex |

|                        |                                                                                                                                                              |                                                                  |                                                                                                                        |                                                                                                                                                                                                                                   |                                                                                                                                                                                                                                                                                                                                                                                                                                                                                                                                                                               |
|------------------------|--------------------------------------------------------------------------------------------------------------------------------------------------------------|------------------------------------------------------------------|------------------------------------------------------------------------------------------------------------------------|-----------------------------------------------------------------------------------------------------------------------------------------------------------------------------------------------------------------------------------|-------------------------------------------------------------------------------------------------------------------------------------------------------------------------------------------------------------------------------------------------------------------------------------------------------------------------------------------------------------------------------------------------------------------------------------------------------------------------------------------------------------------------------------------------------------------------------|
| Rice et al. (2012)     | To examine the acceptability of a youth-led, hybrid face-to-face & online social networking HIV prevention program for homeless youth                        | Myspace & Facebook, digital media projects done on YouTube, etc. | 163 homeless youths, 13-25 years old                                                                                   | 7 "Peer Leaders" recruited homeless youth (53) in the creation of digital media projects, and then recruited online youth (103) to participate in Myspace & Facebook communities where the projects were disseminated & discussed | The peer-led program was highly acceptable to homeless youth; social network analysis revealed that younger youth are disproportionately connected to same aged peers and females are disproportionately connected to other females; online SNS served as a great tool for participant retention as youth felt comfortable returning after missed sessions because their online presence meant they never 'left' the group; some youth leveraged their work in the program as an opportunity to reconnect with positive network ties by sharing online media they had created |
| Madan et al. (2011)    | To determine whether adolescents with tracheostomies found Facebook to be a suitable environment in which to network with other patients with tracheostomies | Facebook                                                         | 9 tracheostomy patients, 4 of which were actively involved on Facebook, 11-18 years old                                | 9-item questionnaire regarding Facebook use                                                                                                                                                                                       | All 4 subjects shared the fact that they had a tracheostomy with the Facebook community; 3/4 subjects posted pictures of themselves with their trach sites visible; 3/4 subjects stated that they met and communicated with other Facebook members with tracheostomies                                                                                                                                                                                                                                                                                                        |
| Woolford et al. (2013) | To explore patients' and parents' perspectives about developing a Facebook group as a component of a pediatric                                               | Facebook Group                                                   | 32 interviews with 11 patients with a BMI at or above 95th percentile for age and gender, 13-18 years old (78% female) | Qualitative analysis by constant comparative method of individual and small-group interviews with participants and their parents                                                                                                  | The vast majority believed having a Facebook group would be a positive addition to the program and expressed few concerns; top potential benefits mentioned: allowing                                                                                                                                                                                                                                                                                                                                                                                                         |

|                        |                                                                                                                                       |     |                                                                                                             |                                                                                                                                                                                                                                                         |                                                                                                                                                                                                                                                                                                                                                                                                                                                                                                                                  |
|------------------------|---------------------------------------------------------------------------------------------------------------------------------------|-----|-------------------------------------------------------------------------------------------------------------|---------------------------------------------------------------------------------------------------------------------------------------------------------------------------------------------------------------------------------------------------------|----------------------------------------------------------------------------------------------------------------------------------------------------------------------------------------------------------------------------------------------------------------------------------------------------------------------------------------------------------------------------------------------------------------------------------------------------------------------------------------------------------------------------------|
|                        | weight management program ( MPOWER)                                                                                                   |     | along with 21 selected parents (13 of whom were parents of adolescents; 8 were parents of younger patients) | who viewed a prototype MPOWER Facebook group developed using information gathered from previous quality improvement projects within the program                                                                                                         | participants to stay connected, bond with each other, gain support for weight loss efforts, maintain motivation to make healthy choices; parents & adolescents emphasized importance of having a "secret" group and have appropriate monitoring and "rules"; nearly all parents reported privacy & security concerns related to social media but not to using Facebook for the program as they considered themselves Facebook "savvy"; parents also expressed interest in a similar group for themselves                         |
| Juvonen & Gross (2008) | To examine the overlap among targets of, and the similarities between, online and in-school bullying among Internet-using adolescents | SNS | 1454 individuals (75% female), 12-17 years old                                                              | participants were recruited via a popular teen website (www.bolt.com) to complete an online questionnaire regarding experiences with "mean things" online, examined association between cyberbullying and social anxiety, the use of prevention tactics | Among heavy Internet users, cyberbullying is a common experience; the forms of online & in-school bullying are similar and experiences overlap; although some forms of electronic communication methods/devices are associated with elevated risk of cyberbullying, they are merely tools (not causes) of mean behavior; cyberbullying is associated with increased distress; youth rarely tell adults about their experiences and do not fully capitalize on the tools provided by communication technologies to prevent future |

|                      |                                                                                                                                                                                                                                    |     |                                                                                                                                                                                   |                                                                                                                                                                    |                                                                                                                                                                                                                                                                                                                                                                                                                                                                                       |
|----------------------|------------------------------------------------------------------------------------------------------------------------------------------------------------------------------------------------------------------------------------|-----|-----------------------------------------------------------------------------------------------------------------------------------------------------------------------------------|--------------------------------------------------------------------------------------------------------------------------------------------------------------------|---------------------------------------------------------------------------------------------------------------------------------------------------------------------------------------------------------------------------------------------------------------------------------------------------------------------------------------------------------------------------------------------------------------------------------------------------------------------------------------|
|                      |                                                                                                                                                                                                                                    |     |                                                                                                                                                                                   |                                                                                                                                                                    | incidents                                                                                                                                                                                                                                                                                                                                                                                                                                                                             |
| Perren et al. (2010) | To investigate the associations between cyber versus traditional bullying and depressive symptoms in Swiss and Australian adolescents                                                                                              | SNS | 2 samples: 374 students from Switzerland (grade 7-9), 1320 students from Australia (grade 8-10), mean age 13.8 years old                                                          | Questionnaire assessing penetration and victimization of traditional and cyber forms of bullying behavior in addition to scales assessing depressive symptoms      | Victims of cyberbullying reported significantly higher levels of depressive symptoms even when controlling for the involvement in traditional bullying/victimization                                                                                                                                                                                                                                                                                                                  |
| Tucker et al. (2013) | To examine the reciprocal longitudinal associations between alcohol or other drug (AOD) -related media exposure and alcohol use among middle school students, and explore whether these associations differ by ethnicity or gender | SNS | 2,321 students: 2,079 who completed first questionnaire and 1,787 who completed second questionnaire a year later, enrolled in grade 6-8 at 16 Southern California middle schools | Cross-lagged correlation analysis of data from two questionnaires to determine the temporal association between past month drinking and AOD-related media exposure | Greater AOD-related media exposure in 7th grade was significantly associated with a higher probability of alcohol use in 8th grade and alcohol use in 7th grade was marginally associated with greater AOD-related media exposure in 8th grade; experimenting with alcohol may encourage adolescents to seek out more AOD-related media content as a way to reinforce their emerging social identity as a drinker; impact on behavior was not different between different media types |
| Machold (2012)       | To determine general patterns of Internet usage among Irish teenagers and to identify potential                                                                                                                                    | SNS | 460 Irish secondary school students, 11-16 years old                                                                                                                              | Questionnaire assessing general patterns and purpose of Internet usage, parental supervision and limitations, as                                                   | Two hours or less were spent online daily by 62% of participants, of whom 98% were unsupervised; 72% reported frequent usage of SNS, 95%                                                                                                                                                                                                                                                                                                                                              |

|                         |                                                                                                                                                                     |          |                                                                                            |                                                                                                                                                      |                                                                                                                                                                                                                                                                                                                                                                                                                    |
|-------------------------|---------------------------------------------------------------------------------------------------------------------------------------------------------------------|----------|--------------------------------------------------------------------------------------------|------------------------------------------------------------------------------------------------------------------------------------------------------|--------------------------------------------------------------------------------------------------------------------------------------------------------------------------------------------------------------------------------------------------------------------------------------------------------------------------------------------------------------------------------------------------------------------|
|                         | hazards, including; bullying, inappropriate contact, overuse, addiction and invasion of users' privacy                                                              |          |                                                                                            | well as hazards associated with SNS use                                                                                                              | of whom were Facebook users; 10% males and 12% females experienced bullying online, while 27% reported inappropriate contact from others; concerning overuse and the risk of addiction, 33% felt they accessed SNS too often                                                                                                                                                                                       |
| Gowen et al. (2012)     | Examine ways that young adults with mental illness 1) currently use social networking; and 2) how they would like to use a social networking site tailored for them | SNS      | 207 with and without mental illness, 18-24 years old                                       | Online questionnaire assessing SNS habits and preferences to inform the creation of an SNS site for those with mental illnesses                      | Almost all (94%) participants with mental illnesses currently use SNS; those living with a mental illness are more likely than those not living with a mental illness to report engaging in various SNS activities that promote connectivity and making online friends, and are also more likely to report wanting resources on independent living skills and overcoming social isolation available through an SNS |
| Wolniczak et al. (2013) | To assess the potential association between Facebook dependence and poor sleep quality among university students in Peru                                            | Facebook | 418 undergraduate students from a Peruvian university, mean age 20.1 years old (77% women) | Questionnaire including Pittsburgh Sleep Quality Index (PSQI) and a questionnaire measuring Internet addiction adapted to assess Facebook dependence | "Facebook-dependent" participants had a 1.3 times higher prevalence of poor sleep quality compared to the non-dependent group; students with Facebook dependence also report more daytime dysfunction; about 8% displayed some degree of Facebook addiction                                                                                                                                                        |

|                         |                                                                                                                                                            |                                                      |                                                                                                                                                                   |                                                                                                                                                                         |                                                                                                                                                                                                                                                                                                                                                                                                                                                   |
|-------------------------|------------------------------------------------------------------------------------------------------------------------------------------------------------|------------------------------------------------------|-------------------------------------------------------------------------------------------------------------------------------------------------------------------|-------------------------------------------------------------------------------------------------------------------------------------------------------------------------|---------------------------------------------------------------------------------------------------------------------------------------------------------------------------------------------------------------------------------------------------------------------------------------------------------------------------------------------------------------------------------------------------------------------------------------------------|
| Campsi et al. (2012)    | To examine perceptions of Facebook use and incidence of upper respiratory infections (URIs)                                                                | Facebook                                             | 88 individuals, 18-24 years old                                                                                                                                   | Facebook-induced stress quantified via questions from a web-based questionnaire and weekly diary of URI symptoms                                                        | Social network size was significantly related to the rate of URI (the larger one's social network, the greater one's incidence of URI); most (85.7%) of respondents experienced some degree of Facebook-induced stress                                                                                                                                                                                                                            |
| Horgan & Sweeney (2012) | To determine university students' online habits and their use of the Internet for health information using a quantitative descriptive approach             | SNS, including mention of Facebook, Bebo and Myspace | 922 university students (62.4% female) from 1 Irish university, 18-24 years old                                                                                   | Use of internet for health information assessed via a 30-item questionnaire administered online over SurveyMonkey email link                                            | 66.1% if participants have used the Internet to search for general health information; information relating to sexual health (16.4%), as well as nutritional information, fitness, & weight loss, and sports-related injuries were most frequently searched; 34.6% reported searching for information on specific medical illnesses                                                                                                               |
| Dowdell et al. (2011)   | To gather information on students' and offenders' levels of engagement with SNS to report patterns as background information for health care professionals | SNS including Myspace, Facebook, & Second Life       | 404 middle school students, 2077 high school students; 1,284 students drawn from 5 traditional 4-year colleges (15-18 years old); 466 adult past sexual offenders | Questionnaires (Youth Internet Safety Survey, YISS; Youth Risk Behavior Surveillance Survey, YRBSS) assessing various characteristics of study participants' use of SNS | Students & offenders both frequent SNS; nearly 2/3 of Internet offenders initiated the topic of sex in their first chat session, more than 1/2 disguised their identity when online, preferred communicating with teen girls; high school students' experience with "sexting" differed according to sex; a small # of people are threatened/assaulted by people they meet online; use of Second Life is popular for both students & sex offenders |

|                      |                                                                                                                                                                              |                                                               |                                                                         |                                                                                                                                                                                    |                                                                                                                                                                                                                                                                                                                                                                                         |
|----------------------|------------------------------------------------------------------------------------------------------------------------------------------------------------------------------|---------------------------------------------------------------|-------------------------------------------------------------------------|------------------------------------------------------------------------------------------------------------------------------------------------------------------------------------|-----------------------------------------------------------------------------------------------------------------------------------------------------------------------------------------------------------------------------------------------------------------------------------------------------------------------------------------------------------------------------------------|
| Landry et al. (2013) | To assess patterns of SMS & SNS use and their relationship to sexual behavior among a population of Latino adolescents                                                       | SNS                                                           | 428 self-identifying Latino adolescents (58% female), 13-19 years old   | Computer-based, audio-assisted questionnaire assessing social media use and sexual behavior                                                                                        | Participants who logged into their social media accounts at least once a day were significantly more likely to have ever had vaginal sex; increased frequency of logging into social media accounts was not significantly associated with contraceptive use                                                                                                                             |
| Li et al. (2013)     | To assess the effectiveness of a fully automated, Web-based, social network electronic game on enhancing mental health knowledge and problem-solving skills of young people. | Facebook                                                      | 73 students at a major university in Asia, 17-25 years old (58% female) | Online pre and post questionnaire: the first collected information on mental health literacy, whereas the second additionally collected modified questions for learning motivation | The gaming approach was effective in enhancing mental health literacy; intrinsic goal orientation was the primary factor in learning motivation, whereas test anxiety was successfully alleviated in the game setting; participants' self-efficacy for learning and performance positively influenced learning outcomes, whereas test anxiety negatively affected them                  |
| Struik et al. (2012) | To explore adolescent girls' perspectives on the use of SNS to deliver tobacco control (TC) messages targeting young women                                                   | SNS including Facebook, Myspace, Facebook Ads for recruitment | 17 females, 16-19 years old                                             | Qualitative analysis of semi-structured focus groups regarding current TC initiatives displayed in common media, thoughts on the use of SNS to deliver TC messages                 | Factors perceived as likely to influence TC message effectiveness on SNS: instant impact, message novelty, portrayal of women as self-assured, and gender stereotyping; suggested changes to current TC messages include the following themes: interaction, animation, and positive message framing; many TC messages directed towards girls are underpinned by assumption about gender |



|                       |                                                                                                                                                                                                                                                         |                                              |                                                                                                                                         |                                                                                                                                                                                                                                                    |                                                                                                                                                                                                                                                                                                                                                                                                                                                           |
|-----------------------|---------------------------------------------------------------------------------------------------------------------------------------------------------------------------------------------------------------------------------------------------------|----------------------------------------------|-----------------------------------------------------------------------------------------------------------------------------------------|----------------------------------------------------------------------------------------------------------------------------------------------------------------------------------------------------------------------------------------------------|-----------------------------------------------------------------------------------------------------------------------------------------------------------------------------------------------------------------------------------------------------------------------------------------------------------------------------------------------------------------------------------------------------------------------------------------------------------|
| Black et al. (2013)   | To examine the relationship between individual perception of and actual peer sexual risk behavior using online social networks                                                                                                                          | Facebook Pages                               | ethnically diverse group of 1,029 individuals from 162 virtual social networks, 16-25 years old                                         | Online questionnaire through Zoomerang using validated constructs assessing a participant's own sexual behavior (protective & risky behavior) as well as perceptions of peer behavior                                                              | Participants significantly over-reported (estimated) risky behaviors of their peers and under-reported protective peer behaviors related to sex; participants perceive their peers are being more risky than they actually are                                                                                                                                                                                                                            |
| Litt & Stock (2011)   | To examine impact of socially-based descriptive norms on willingness to drink alcohol, drinker prototype favorability, affective alcohol attitudes, and perceived vulnerability for alcohol-related consequences within the Prototype Willingness model | Facebook Profiles created for study purposes | 189 adolescents from 5 private high schools, a swim team, and church youth group, 13-15 years old                                       | Participants were assigned to 1 of 2 conditions (alcohol user vs. control), and viewed & rated a series of fabricated Facebook profiles, reactions of participants were assessed by questionnaire, data examined using multiple mediation analysis | Those who viewed Facebook profiles that portrayed alcohol use as normative among older peers reported greater willingness to use alcohol, more favorable images of alcohol users, more positive affective attitudes towards alcohol use, lower perceived vulnerability to the consequences of drinking alcohol, and greater perceived norms of alcohol use; normative influence of older peers had a significant impact on risk cognitions in adolescents |
| Young & Jordan (2013) | To test whether photos posted on social networking profiles may influence perceived social norms and thereby affect sexual health behavioral intentions                                                                                                 | Public Facebook photos                       | Study 1: 49 private university students, 18-23 y.o.; Study 2: 154 college-students, 18-25 y.o., recruited from Amazon's Mechanical Turk | Participants were randomly assigned to complete 1 of two online questionnaires: one which featured sexually suggestive photos and the other which featured non-sexually suggestive photos                                                          | Even a brief exposure to Facebook photos can convey information about peer norms, which in turn, may influence people's own sexual behavior intentions, owing to the importance of subjective norms in determining human behavior in general                                                                                                                                                                                                              |

|                          |                                                                                                                                                                     |                                                            |                                                                                                                                    |                                                                                                                                                                                                                                                                                                                                                                    |                                                                                                                                                                                                                                                                                                                                                                                                                                                                                                    |
|--------------------------|---------------------------------------------------------------------------------------------------------------------------------------------------------------------|------------------------------------------------------------|------------------------------------------------------------------------------------------------------------------------------------|--------------------------------------------------------------------------------------------------------------------------------------------------------------------------------------------------------------------------------------------------------------------------------------------------------------------------------------------------------------------|----------------------------------------------------------------------------------------------------------------------------------------------------------------------------------------------------------------------------------------------------------------------------------------------------------------------------------------------------------------------------------------------------------------------------------------------------------------------------------------------------|
| Jones K et al. (2012)    | To evaluate an evidence-based SNS intervention consisting of a Facebook site aimed at reducing the incidence of Chlamydia                                           | Facebook Profile created for study purposes, "Caryn Forya" | 70 individuals residing in a Midwestern US community, 18-24 years old                                                              | Questionnaire administered over Askpeople (internal health department survey software package), pre- and post intervention responses to STD diagnosis and testing were compared against county statistics                                                                                                                                                          | 81% of subjects felt that the site influenced their decision to use sexual protection in future sexual experiences (23% increase in condom use following intervention); 74% felt that the intervention impacted their decision to reduce their # of sexual partners                                                                                                                                                                                                                                |
| Bull et al. (2012)       | To determine whether STI prevention messages delivered via a Facebook page are efficacious in preventing increases in sexual risk behavior at 2 and 6 months        | Facebook Pages                                             | 942 intervention (427 completed 6-month follow-up) and 636 control (377 completed 6-month follow-up) individuals, 16-25 years old  | Participants randomized to intervention (Just/Us Facebook page) updated by youth facilitators with sexual health topics or control (18-24 News Facebook page) containing non-sexual health content; participants completed online questionnaire delivered via Zoomerang (online questionnaire software) to evaluate sexual health risk behaviors at 2 and 6 months | Intervention was effective in facilitating prevention of declines in condom use among high-risk individuals in the short term; effect size match or exceed those from meta-analysis of Internet interventions; recruitment strategy employing Facebook was successful in reaching youth of color/those living in areas with high STI/HIV prevalence; engagement with interventional content occurred almost exclusively on individuals' own pages; attrition among higher-risk youth is of concern |
| Livingston et al. (2013) | Evaluate the effectiveness of the In One Voice campaign for raising mental health awareness and improving attitudes of youth and young adults towards mental health | Mindcheck.ca                                               | 806 total individuals recruited through a market research company, 13-25 years old, who were randomly divided into 2 equal samples | Online questionnaire pre- and post-campaign using two randomized groups to assess market penetration and attitudinal changes of the campaign                                                                                                                                                                                                                       | The proximal outcomes of the campaign to increase awareness and use of the website were achieved; the distal outcome of the campaign to improve attitudes towards mental health issues was not successfully achieved; the campaign improved mental health literacy                                                                                                                                                                                                                                 |

|                           |                                                                                                                                                                                                                                    |                              |                                                                               |                                                                                                                                                                                                                                                |                                                                                                                                                                                                                                                                                                                  |
|---------------------------|------------------------------------------------------------------------------------------------------------------------------------------------------------------------------------------------------------------------------------|------------------------------|-------------------------------------------------------------------------------|------------------------------------------------------------------------------------------------------------------------------------------------------------------------------------------------------------------------------------------------|------------------------------------------------------------------------------------------------------------------------------------------------------------------------------------------------------------------------------------------------------------------------------------------------------------------|
|                           | issues                                                                                                                                                                                                                             |                              |                                                                               |                                                                                                                                                                                                                                                | outcomes, but had limited effect on personal stigma and social distance                                                                                                                                                                                                                                          |
| Gunasekaran et al. (2013) | To assess knowledge of cervical cancer/HPV among young women & investigate predictors of high knowledge                                                                                                                            | Facebook Ads for recruitment | 278 females, 16-25 years old                                                  | Recruitment for a web-based questionnaire regarding HPV                                                                                                                                                                                        | Facebook ads resulted in efficient & cost-effective recruitment method; the geographic region, indigenous status, and SES of participants did not differ from Australian Bureau of Statistics distribution but women aged 16-17 and with lower education status were under-represented in study sample           |
| Gamage et al. (2011)      | To evaluate the effectiveness of advertising for "TESTme", an STI screening service to those in rural areas of Australia over an 11-month period                                                                                   | Facebook Page                | 28 rural young people, of which 1 was recruited via Facebook, 18-25 years old | Assessed direct cost of advertising through the different strategies, clients recruited & those who returned specimens, website visitors & page views                                                                                          | Advertising through paper-based methods, SMS, and SNS were not effective; the majority of those recruited accessed service through other HCP, or found it while looking for health services or health info online; Facebook page advertising incurred \$1408                                                     |
| Lord et al. (2011)        | To assess the feasibility of implementing a survey study about prescription medication misuse with college students on Facebook and identify the characteristics, motivations, beliefs, and attitudes associated with experimental | Facebook Ads                 | 689 college students, 18-25 years old                                         | Facebook advertisement to recruit for a 95-item questionnaire assessing nonmedical medication-related constructs; one open-ended question asking "What is your opinion about using prescription drugs that aren't prescribe to you?" which was | Recruitment strategy was successful (average click-through rate of 0.02-0.04%); 27% of those who clicked on the ad completed consent, all despite lack of incentive for competing questionnaire; 61% of the sample reported having misused both prescription opioids and stimulants at some point in their lives |

|                           |                                                                                                                                                 |              |                                                                                                                                                                                               |                                                                                                                                                                              |                                                                                                                                                                                                                                                            |
|---------------------------|-------------------------------------------------------------------------------------------------------------------------------------------------|--------------|-----------------------------------------------------------------------------------------------------------------------------------------------------------------------------------------------|------------------------------------------------------------------------------------------------------------------------------------------------------------------------------|------------------------------------------------------------------------------------------------------------------------------------------------------------------------------------------------------------------------------------------------------------|
|                           | vs. regular misuse of prescription opioid analgesic medications                                                                                 |              |                                                                                                                                                                                               | qualitatively analyzed using a coding scheme                                                                                                                                 |                                                                                                                                                                                                                                                            |
| Ahmed et al. (2013)       | To examine potential barriers and facilitating factors for screening in young Victorian women using Facebook to recruit participants            | Facebook Ads | 278 women 16-25 years old from Victoria, Australia                                                                                                                                            | Targeted recruitment using Facebook ads                                                                                                                                      | Facebook ads yielded a total of 551 expressions from 7940 unique clicks: of these, 426 (77%) were contactable, all of whom were enrolled in the study; overall participation rate was 65% (n=278 out of 426)                                               |
| Chu & Snider (2013)       | Describe the effectiveness of using Facebook Ads for recruitment for a study evaluating the prevalence of PTSD in youth affected by violence    | Facebook Ads | 88 individuals who filled out surveys, 15-24 years old                                                                                                                                        | Advertising performance data including cost of each click and impression and click-through-ratio                                                                             | Total # of clicks & impressions were much higher on weekends; method was relatively inexpensive and required minimal personnel; Facebook's performance tracking allowed researchers to optimize their strategy more effectively                            |
| Kraaij & Garnefski (2012) | To examine relevant coping factors for the developments of psychological intervention programs for adolescents with a chronic medical condition | A Dutch SNS  | 101 adolescents self-identifying with a chronic medical condition (32% male) recruited from a Dutch SNS site and Internet forums along with 75 adolescents recruited from special schools for | Questionnaire assessing characteristics of one's chronic medical condition, negative life events, cognitive, behavioral, and goal adjustment coping, and depressive symptoms | Several cognitive and behavioral coping strategies and goal adjustment were found to be related to symptoms of depression. The cognitive coping strategies (self-blame, rumination and catastrophizing) had the strongest influence on depressive symptoms |

|                     |                                                                                                                                                                        |                   |                                                                                                                    |                                                                                                                                                                    |                                                                                                                                                                                                                                                                                                                                                                                                                                                                                                                                                                                          |
|---------------------|------------------------------------------------------------------------------------------------------------------------------------------------------------------------|-------------------|--------------------------------------------------------------------------------------------------------------------|--------------------------------------------------------------------------------------------------------------------------------------------------------------------|------------------------------------------------------------------------------------------------------------------------------------------------------------------------------------------------------------------------------------------------------------------------------------------------------------------------------------------------------------------------------------------------------------------------------------------------------------------------------------------------------------------------------------------------------------------------------------------|
|                     |                                                                                                                                                                        |                   | adolescents with a disability, 12-21 years old                                                                     |                                                                                                                                                                    |                                                                                                                                                                                                                                                                                                                                                                                                                                                                                                                                                                                          |
| Ezell et al. (2013) | Analyze the results of four retention strategies used to reconnect with urban teens enrolled in a school-based RCT and overdue for a 12-month follow-up questionnaire. | Facebook          | 125 students overdue for 12-mth follow up out of 422 total enrolled students                                       | Compared 4 retention strategies: re-mailing reminder letter, re-dialing non-working phone #, outreach on Facebook, obtaining assistance from school administration | 42% of total attempts made to re-connect with the 125 students overdue for follow-up were successful; success rates for retention strategies: redialing non-working phone # on weekly basis (68%); obtaining assistance from school admin (57%); Facebook outreach (47%); mailed reminder letter (32%)                                                                                                                                                                                                                                                                                   |
| Huang et al. (2013) | To examine the use of SNSs among friends and the degree to which SNS activities relate to face-to-face peer influences and adolescent risk behaviors                   | Facebook, Myspace | 1,563 10th-grade students from 5 high schools who completed questionnaires at 2 time points, mean age 15 years old | Questionnaire regarding tobacco/alcohol use, social media use, egocentric friend characteristics                                                                   | Frequency of SNS use and # of closest friends on the same SNS were not significantly associated with risk behaviors, but exposure to friends' online photos of partying/drinking was significantly associated with both smoking and alcohol use; those with drinking friends had higher risk levels for drinking, but those without drinking friends were more likely to be affected by higher exposure to risky online photos; Myspace & Facebook has different demographics and differential effects on risk behaviors (higher levels of Myspace use were associated with alcohol use) |
